# Supplementary material
Source: PubMed Central journal article supplement (PMC509230)

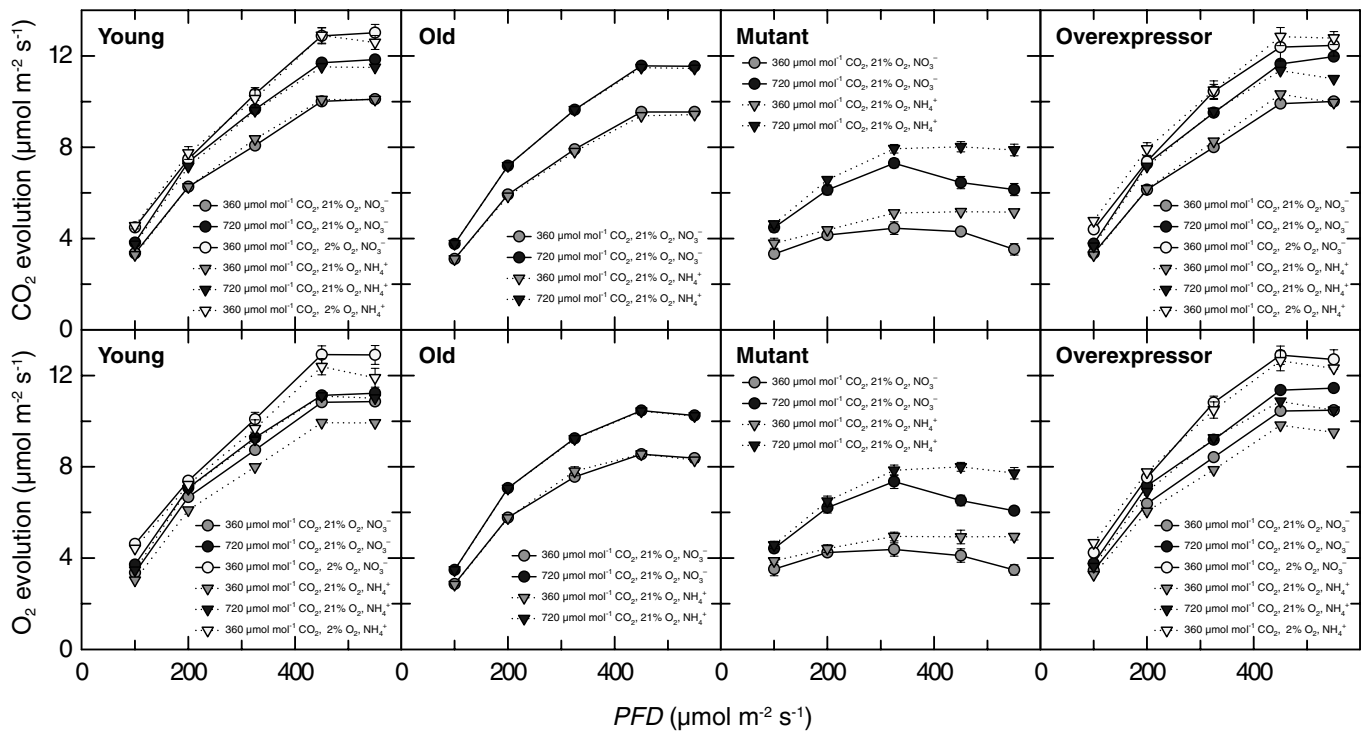

Supplement: pnas_101_31_11506__1.pdf [file pnas_101_31_11506__1.pdf]

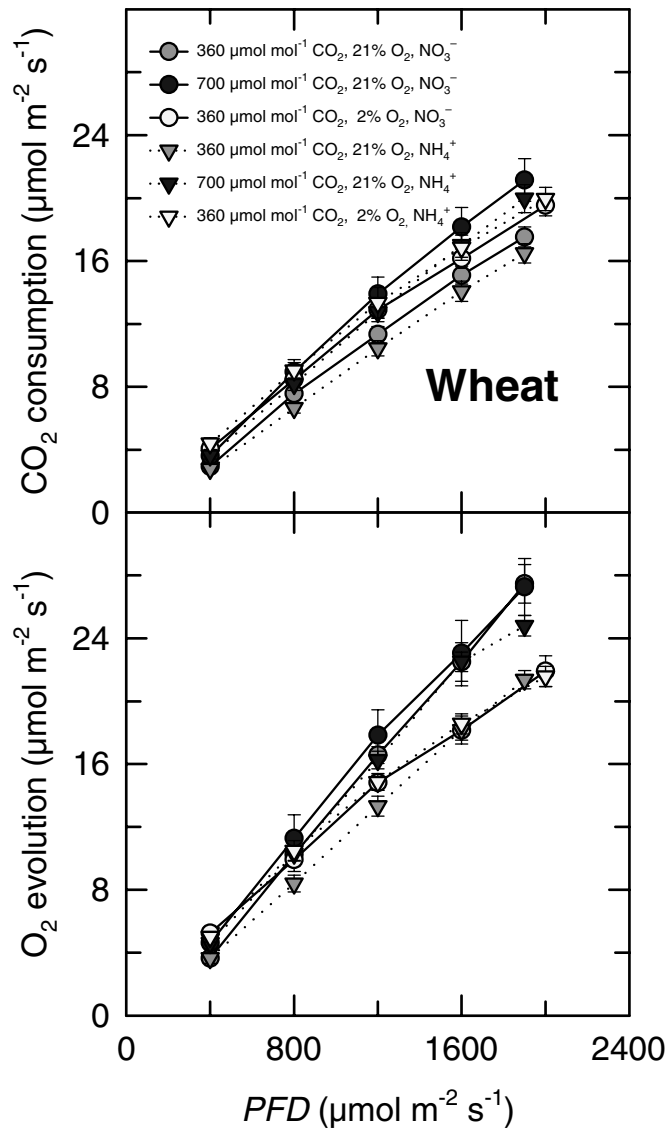

Supplement: pnas_101_31_11506__2.pdf [file pnas_101_31_11506__2.pdf]
